# Supplementary material
Source: PubMed Central journal article supplement (PMC6470047)
Supplement: NIHMS996325-supplement-Supplemental.pdf [file NIHMS996325-supplement-Supplemental.pdf]

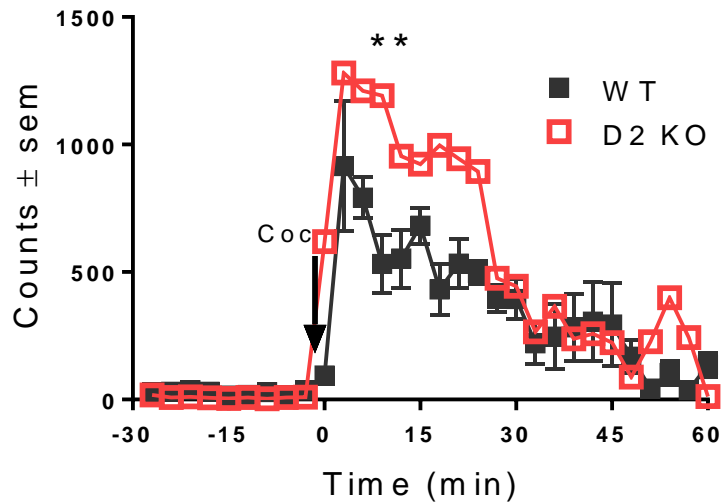

Supporting Information Figure 1: Cocaine (Coc)-stimulated hyperlocomotion is significantly greater in D2R knockout (D2 KO) mice than in WT mice. Data are taken from Figures 5a and 5b. In 2-way RM ANOVA, there is a significant difference in time ( $F(29, 174) = 14.48$ ,  $p < 0.001$ ), genotype ( $F(1, 6) = 9.102$ ,  $p < 0.05$ ) and the interaction of genotype and time ( $F(29, 174) = 1.605$ ,  $p < 0.05$ ). In post hoc Bonferroni analysis,  $**p = 0.01$  ( $n=4$ ).
